# Supplementary material for: Visualization of the biphasic calcium wave during fertilization in Caenorhabditis elegans using a genetically encoded calcium indicator
Source: PubMed Central journal article supplement (PMC10655868; doi:10.1242/bio.059832), 2023-08-21
Supplement: biolopen-12-059832-s1.pdf [file biolopen-12-059832-s1.pdf]

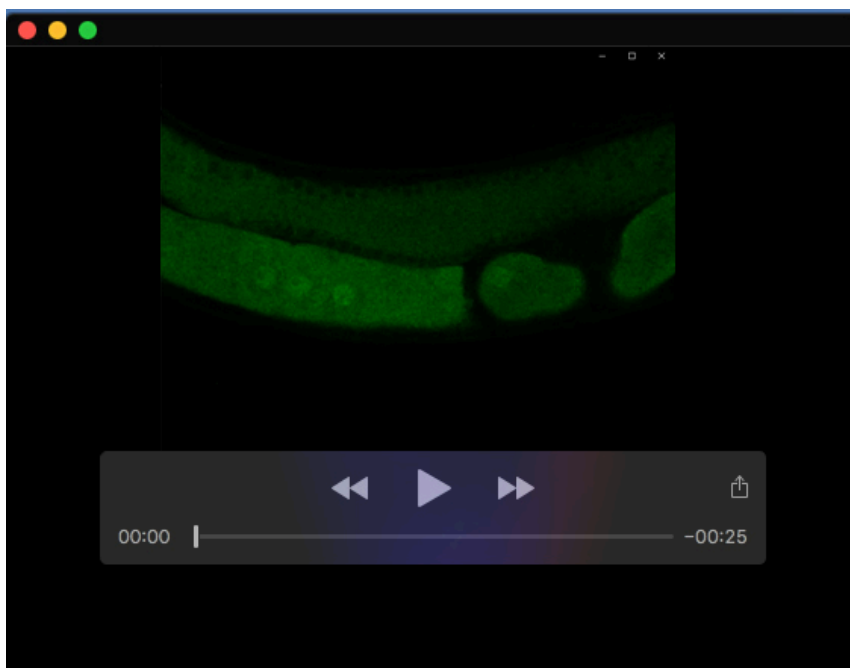

**Movie 1. Biphasic calcium wave**

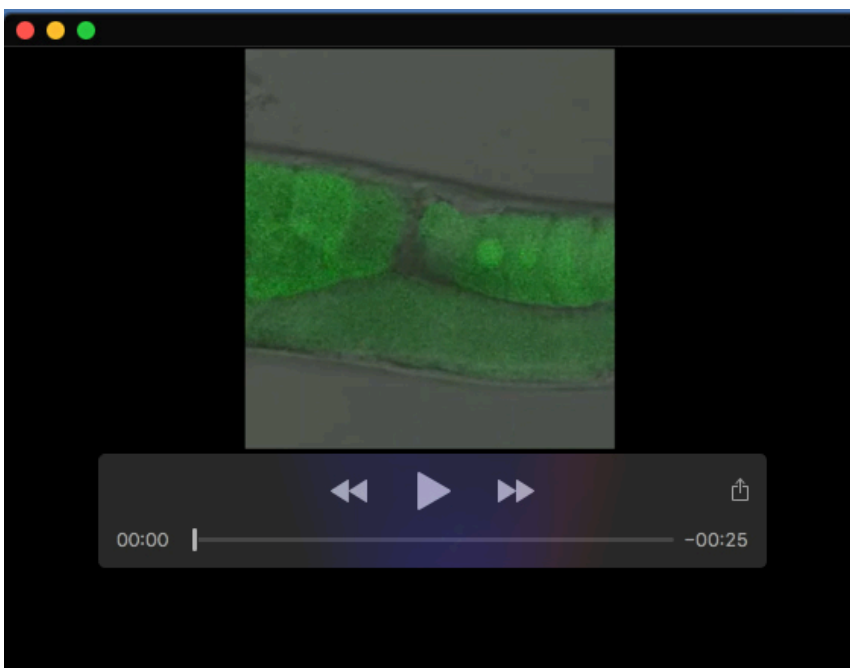

**Movie 2. Polyspermy**
